# Supplementary material for: 3D hierarchical core–shell structural NiCoMoS@NiCoAl hydrotalcite for high-performance supercapacitors
Source: Royal Society of Chemistry journal article supplement (doi:10.1039/d2ta00782g), 2022-01-01
Supplement: d2ta00782g1.pdf [file d2ta00782g1.pdf]

# **3D hierarchical core-shell structural NiCoMoS@ NiCoAl hydrotalcite for high-performance supercapacitors**

Kai Zhang, Hong-Yan Zeng\*, Ming-Xin Wang, Hao-Bo Li, Wei Yan, Huan-Bin  
Wang, Zhen-Hua Tang

*College of Chemical Engineering, Xiangtan University, Xiangtan 411105, Hunan,  
China*

\*Corresponding Author

Hong-Yan Zeng

E-mail address: hongyanzeng99@hotmail.com; hyzeng@xtu.edu.

**Fig. S1**

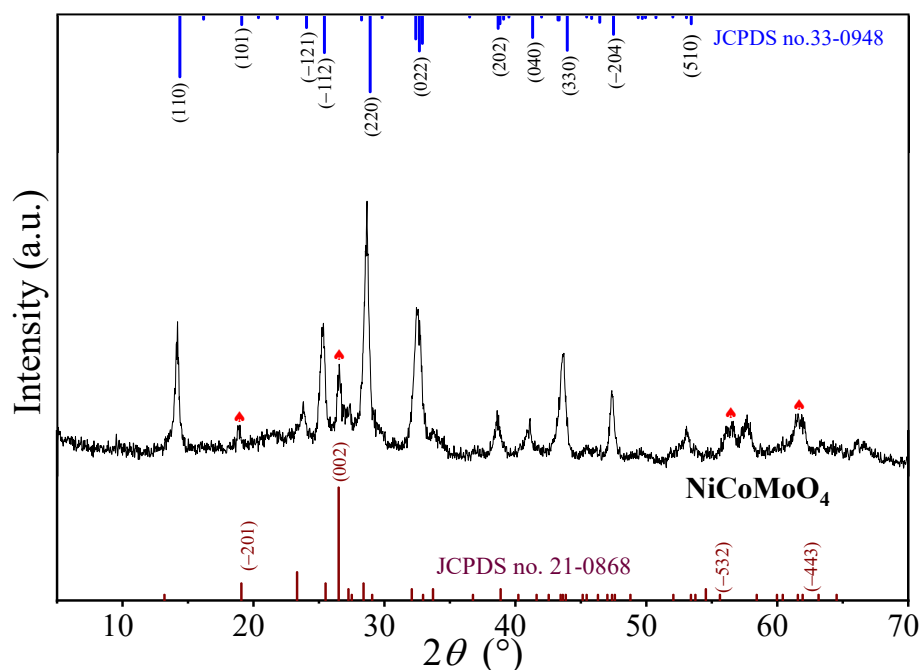

For the calcined product ( $\text{NiCoMoO}_4$ ), the diffraction peaks at 14.3, 19.2, 23.6, 25.5, 28.8, 32.6, 38.6, 41.2, 43.9, 47.4 and 53.3 $^\circ$  were separately corresponded to the (110), (101), (-121), (-112), (220), (022), (202), (040), (330), (-204) and (510) crystal planes of  $\alpha$ - $\text{NiMoO}_4$  structure (JCPDS no. 33-0948). Meanwhile, the weak diffraction peaks at 19.1, 26.5, 56.0 and 61.9 $^\circ$  could be (-201), (002), (-532) and (-443) crystal planes of  $\text{CoMoO}_4$  (JCPDS Card no. 21-0868). The two crystalline phases of in the XRD demonstrated that  $\text{CoNiMoO}_4$  was successfully synthesized by transforming the  $\text{NiCoMo}$  precursor into the mixed metal oxide  $\text{NiCoMoO}_4$  using calcination, as described in the literature [1,2].

## Reference

1. Li Y, Li J, Qian Q, Jin X, Liu Y, Li Z, Zhang G. Superhydrophilic Ni-based multicomponent nanorod-confined-nanoflake array electrode achieves waste-battery-driven hydrogen evolution and hydrazine oxidation. *Small*. 2021, 17(19): 2008148.
2. Gu M, Deng X, Lin M, Wang H, Gao A, Huang X, Zhang X. Ultrathin NiCo bimetallic molybdate nanosheets coated  $\text{CuO}_x$  nanotubes: Heterostructure and bimetallic synergistic optimization of the active site for highly efficient overall water splitting. *Adv. Energy Mater.* 2021, 11(41): 2102361.

**Fig. S2** CV curves of the NiCoAl-LDH, NiCoMoS<sub>2/1</sub> and NiCoMoS@LDH at different scan rates.

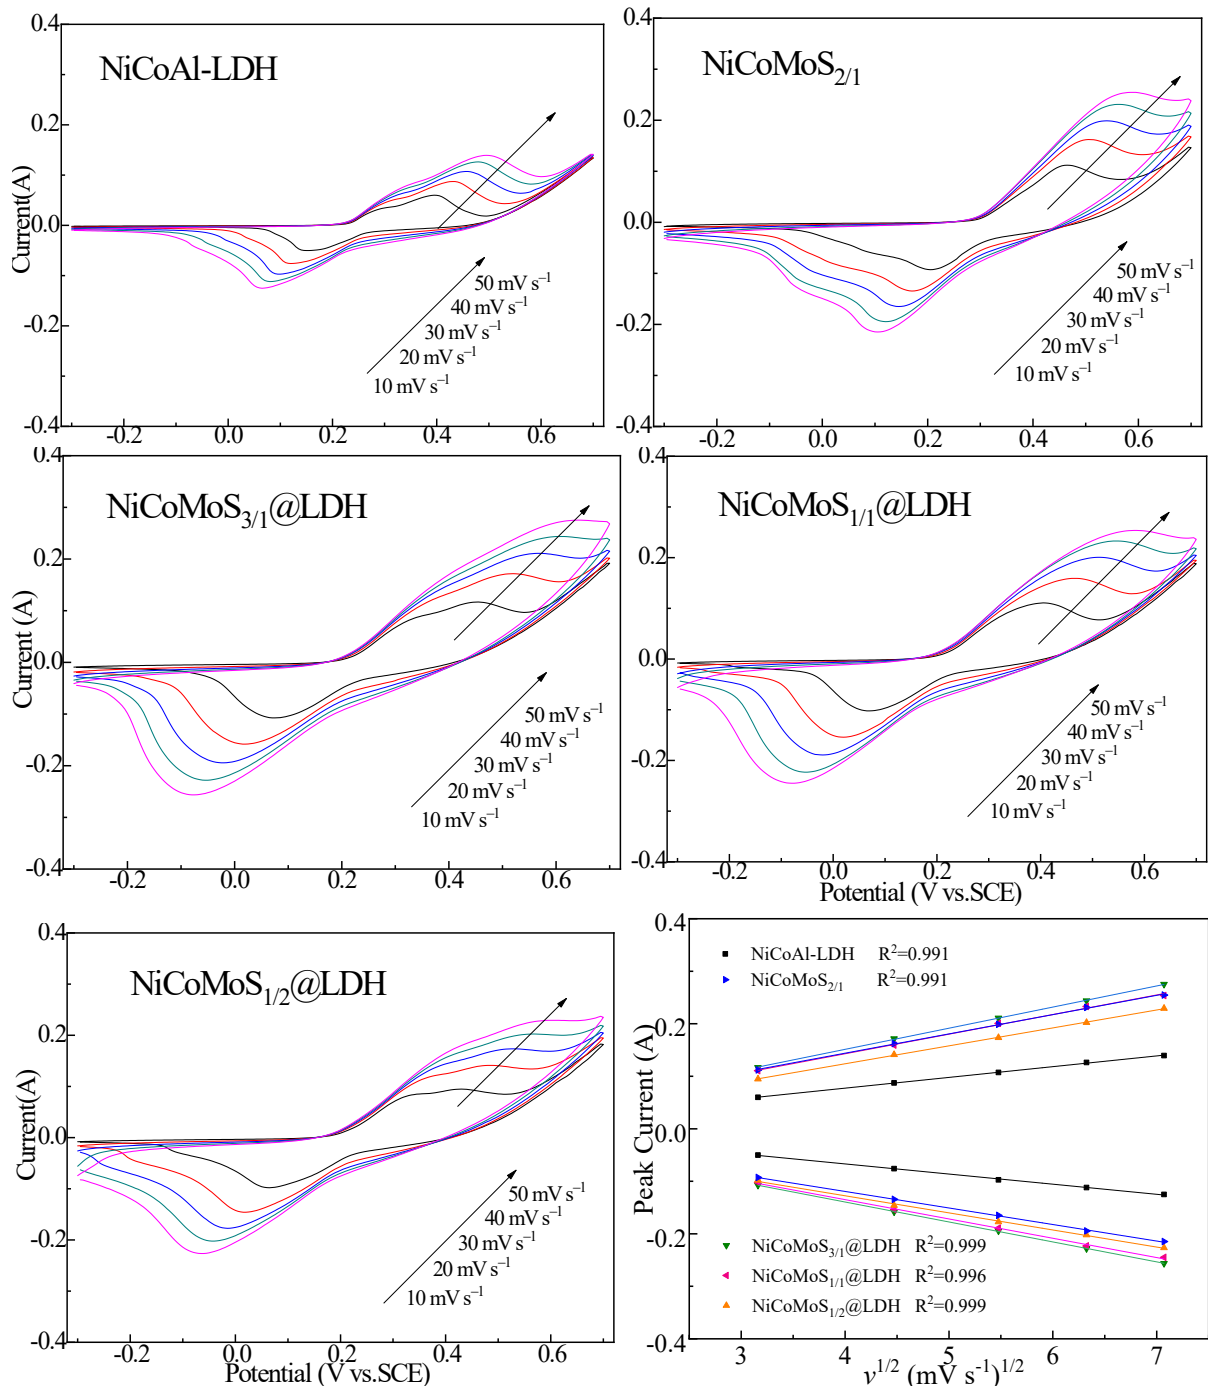

**Fig. S3** GCD curves of the NiCoAl-LDH, NiCoMoS<sub>2/1</sub> and NiCoMoS@LDH at different current densities.

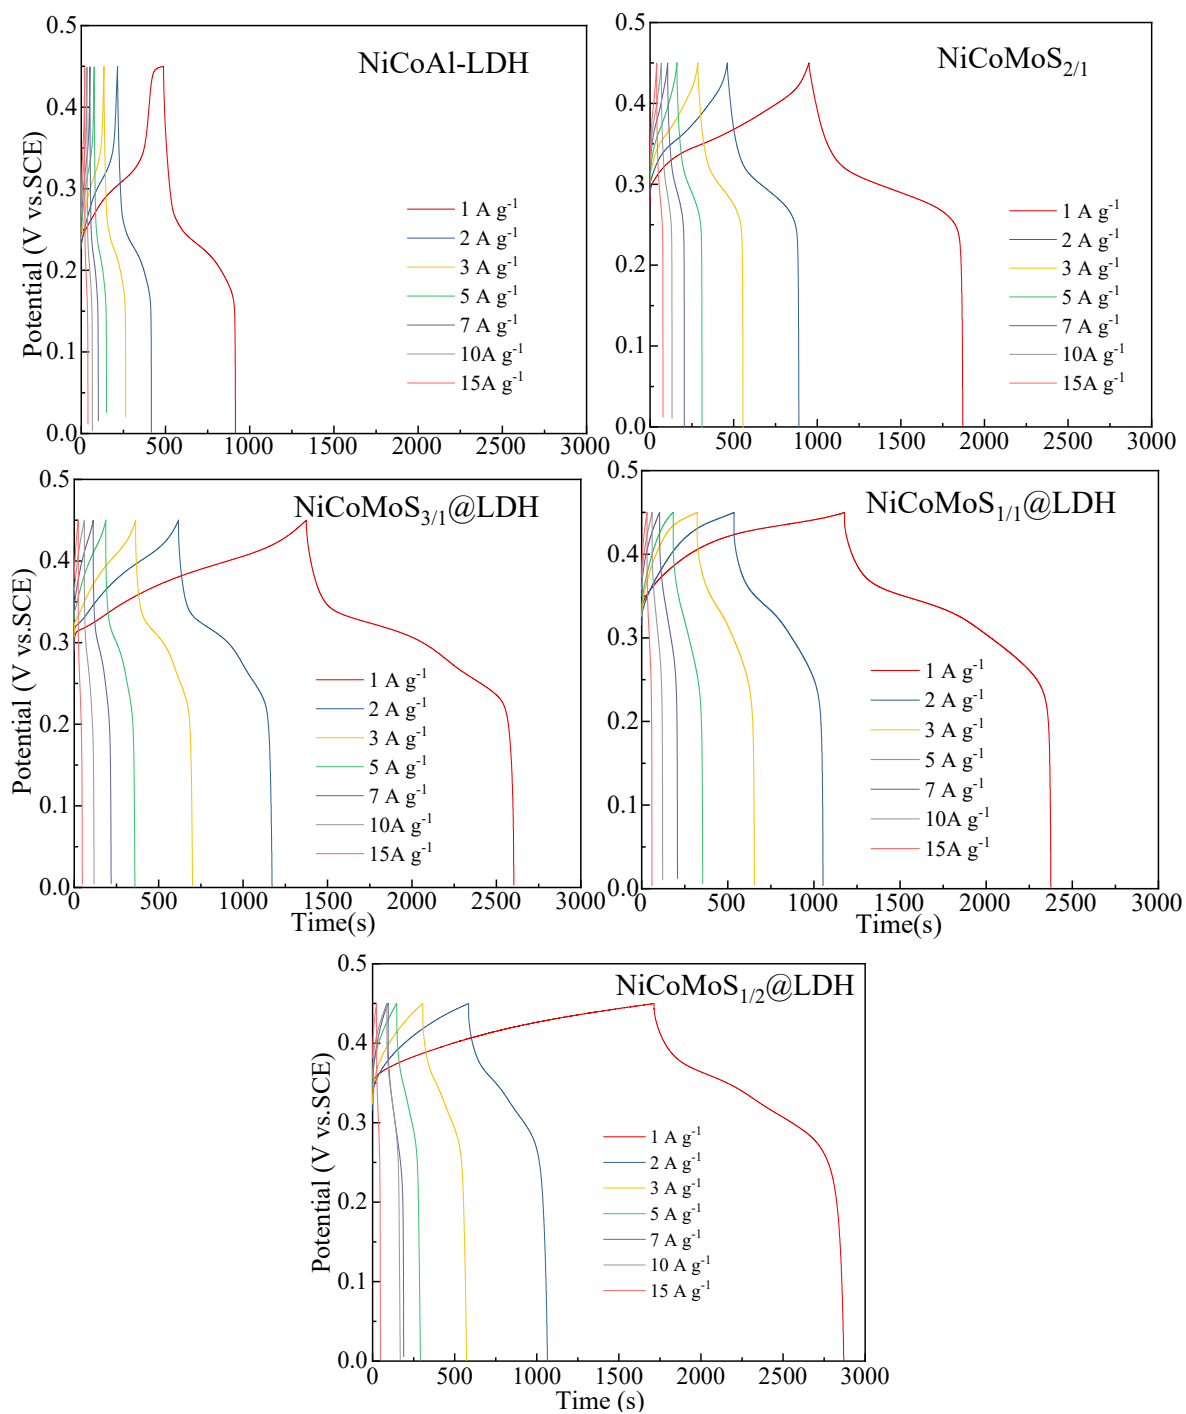

**Table S1** Peak positions of the XPS spectra for the NiCoMoS<sub>2/1</sub> and NiCoMoS<sub>2/1</sub>@LDH.

|       |                   | NiCoMoS <sub>2/1</sub> | NiCoMoS <sub>2/1</sub> @LDH |
|-------|-------------------|------------------------|-----------------------------|
| Ni 2p | 2p <sub>1/2</sub> | 873.9 eV               | 873.5 eV                    |
|       | 2p <sub>3/2</sub> | 856.3 eV               | 856.0 eV                    |
| Co 2p | 2p <sub>1/2</sub> | 793.3 eV               | 797.1 eV                    |
|       | 2p <sub>3/2</sub> | 778.5 eV               | 781.4 eV                    |
| O 1s  | -                 | -                      | 531.5 eV                    |
| Mo 3d | 3d <sub>3/2</sub> | 234.3 eV               | 235.0 eV                    |
|       | 3d <sub>5/2</sub> | 232.7 eV               | 232.5 eV                    |
| S 2p  | 2p <sub>1/2</sub> | 162.6 eV               | 163.1 eV                    |
|       | 2p <sub>3/2</sub> | 161.4 eV               | 161.9 eV                    |
| Al 2p | -                 | -                      | 74.2 eV                     |

**Table S2** Electrochemistry performances of the NiCoAl-LDH, NiCoMoS<sub>2/1</sub> and NiCoMoS@LDH.

|                             | $A^*$<br>( $\times 10^{-2}$ ) | $b$   | $r^2_{pa}$ | CV                               |            |                                  |            | EIS                      |                       | $C_s$<br>(C g <sup>-1</sup> , at 1 A g <sup>-1</sup> ) |
|-----------------------------|-------------------------------|-------|------------|----------------------------------|------------|----------------------------------|------------|--------------------------|-----------------------|--------------------------------------------------------|
|                             |                               |       |            | $k_{pa}^*$<br>(s <sup>-1</sup> ) | $R^2_{pa}$ | $k_{pc}^*$<br>(s <sup>-1</sup> ) | $R^2_{pc}$ | $R_{ct}$<br>( $\Omega$ ) | $R_s$<br>( $\Omega$ ) |                                                        |
| NiCoAl-LDH                  | 4.60                          | 0.527 | 0.999      | 0.020                            | 0.991      | -0.019                           | 0.998      | 4.496                    | 0.975                 | 427.0                                                  |
| NiCoMoS <sub>2/1</sub>      | 9.18                          | 0.513 | 0.998      | 0.037                            | 0.999      | -0.031                           | 0.999      | 2.848                    | 1.564                 | 919.8                                                  |
| NiCoMoS <sub>3/1</sub> @LDH | 10.84                         | 0.530 | 0.999      | 0.040                            | 0.999      | -0.038                           | 0.999      | 0.811                    | 0.706                 | 1231.0                                                 |
| NiCoMoS <sub>2/1</sub> @LDH | 14.69                         | 0.490 | 0.999      | 0.048                            | 0.999      | -0.039                           | 0.995      | 0.144                    | 0.641                 | 1336.0                                                 |
| NiCoMoS <sub>1/1</sub> @LDH | 10.52                         | 0.525 | 0.999      | 0.037                            | 0.996      | -0.037                           | 0.998      | 1.274                    | 0.873                 | 1197.4                                                 |
| NiCoMoS <sub>1/2</sub> @LDH | 9.91                          | 0.546 | 0.999      | 0.034                            | 0.999      | -0.033                           | 0.998      | 1.764                    | 0.875                 | 1151.1                                                 |
